# Supplementary material for: Raspberry-Like Bismuth Oxychloride on Mesoporous Siliceous Support for Sensitive Electrochemical Stripping Analysis of Cadmium
Source: MDPI journal article supplement (doi:10.3390/molecules22050797), 2017-05-13
Supplement: s1 [file s1]

Supplementary information

## Raspberry-Like Bismuth Oxychloride on Mesoporous Siliceous Support for Sensitive Electrochemical Stripping Analysis of Cadmium

Yiyan Song<sup>1</sup>, Zhihui Xu<sup>1</sup>, Xinyu Yu<sup>1</sup>, Xueyan Shi<sup>2</sup>, Huijun Jiang<sup>2</sup>,

Xiaoming Li<sup>3</sup>, Yan Kong<sup>3</sup>, Qin Xu<sup>4</sup> and Jin Chen<sup>1,5,\*</sup>

<sup>1</sup> School of Public Health, Nanjing Medical University, 211166 Nanjing, China.

<sup>2</sup> School of Pharmacy, Nanjing Medical University, 211166 Nanjing, China.

<sup>3</sup> State Key Laboratory of Materials-Oriented Chemical Engineering, College of Chemistry and Chemical Engineering, Nanjing University of Technology, 211166 Nanjing, China.

<sup>4</sup> College of Chemistry and Chemical Engineering, Yangzhou University, Yangzhou 225002, China

<sup>5</sup> The Key Laboratory of Modern Toxicology, Ministry of Education, School of Public Health, Nanjing Medical University, 210093 Nanjing, China.

Correspondence and request for materials should be addressed to J.C. (email: okachen30@gmail.com; jchen@njmu.edu.cn)

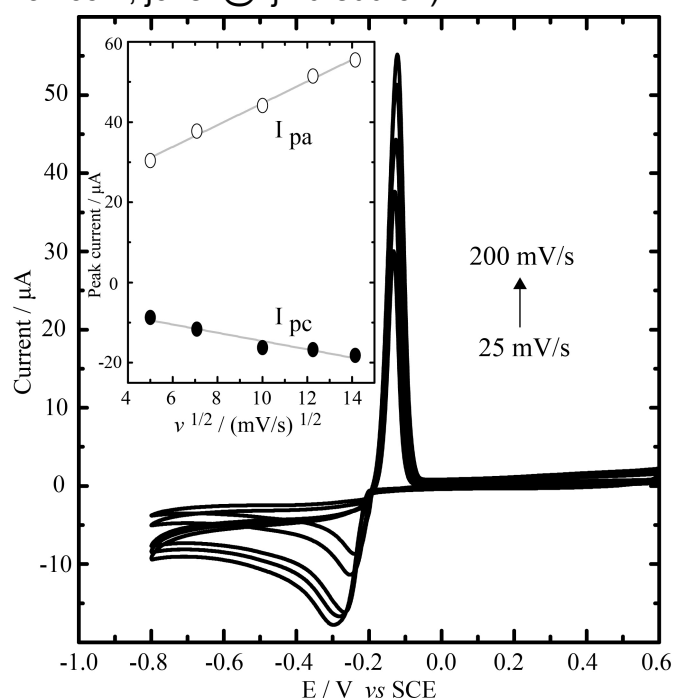

**Figure S1.** Cyclic voltammograms of a glassy carbon electrode in 1 mol/L HCl containing BiOCl-SiO<sub>2</sub> KIT-6 composite (50 mg/L) at the different scan rates of 25, 50, 100, 150 and 200 mV/s. The inset shows the linear relationship between the peak current ( $I_p$ ) and the square root of the scan rate ( $v^{1/2}$ ).

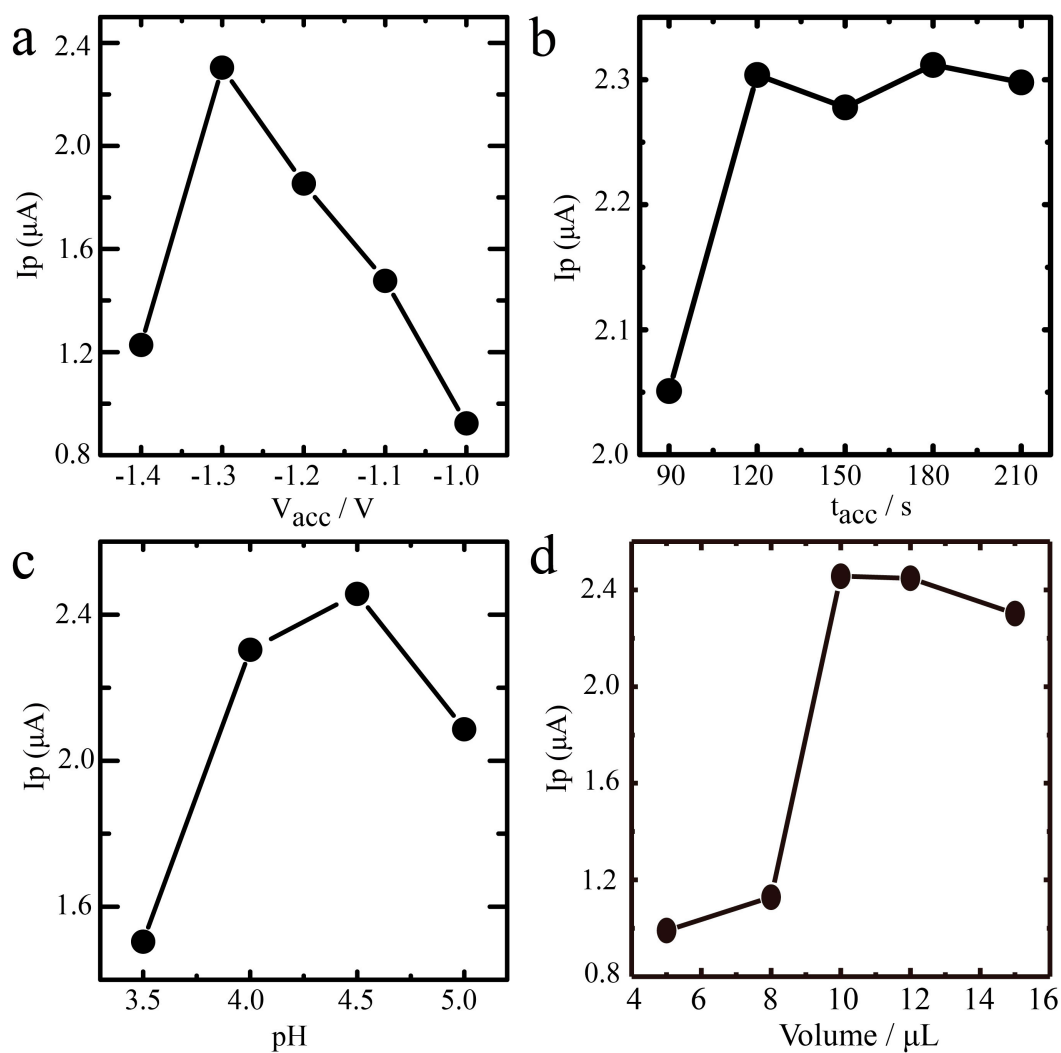

**Figure S2.** Square wave anodic stripping voltammetry (SWASV) responses of 50  $\mu\text{g/L}$  of  $\text{Cd}^{2+}$  on  $\text{BiOCl-SiO}_2$  KIT-6/GCE with (a) different deposition potentials from -1.0 - -1.4 V (0.1 M acetate buffer pH 4.0; deposition time 120 s; 10  $\mu\text{L}$  of  $\text{BiOCl-SiO}_2$  KIT-6 composite suspension-modified GCE); (b) different deposition times from 90 - 210 s (0.1 M acetate buffer pH 4.0; deposition potential -1.3 V; 10  $\mu\text{L}$  of  $\text{BiOCl-SiO}_2$  KIT-6 composite suspension-modified GCE); (c) different pH levels from 3.5 - 5.0 in 0.1 M acetate buffer solution (deposition potential -1.3 V; deposition time 120 s; 10  $\mu\text{L}$  of  $\text{BiOCl-SiO}_2$  KIT-6 composite suspension-modified GCE); and (d) different volumes of  $\text{BiOCl-SiO}_2$  KIT-6 composite suspension (1 mg/mL) from 5-15  $\mu\text{L}$  used to modify the GCE (deposition potential -1.3 V; deposition time 120 s; 0.1 M acetate buffer pH 4.5).

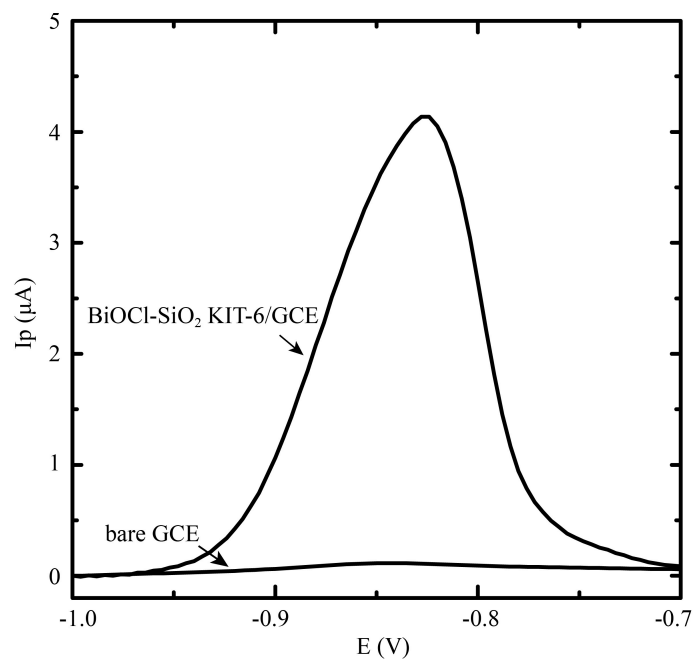

**Figure S3.** SWASV responses of  $\text{Cd}^{2+}$  of the concentration of  $100 \mu\text{g/L}$  on  $\text{BiOCl-SiO}_2 \text{ KIT-6/GCE}$  and bare GCE.

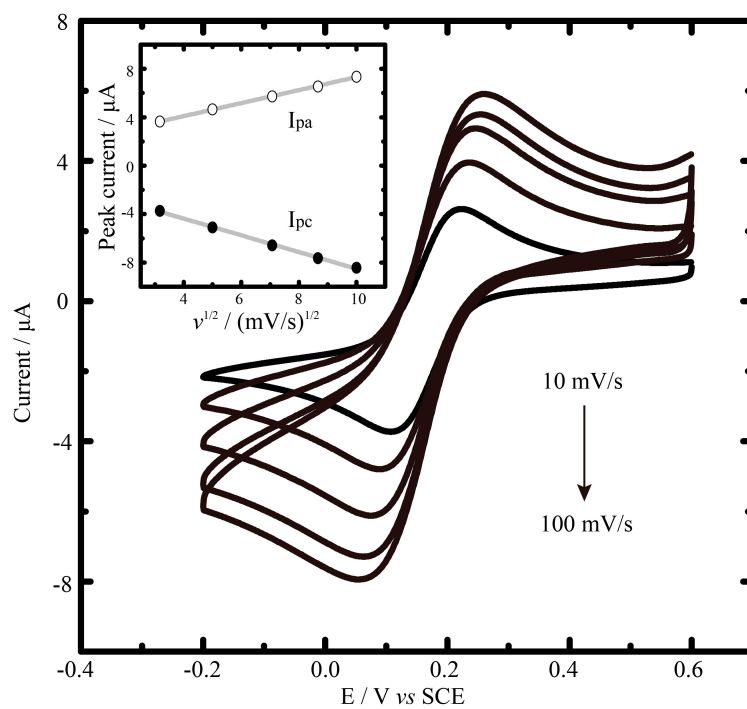

**Figure S4.** Cyclic voltammograms of  $\text{BiOCl-SiO}_2 \text{ KIT-6/GCE}$  in  $1 \text{ mmol/L K}_3[\text{Fe}(\text{CN})_6]$  solution containing  $0.1 \text{ mol/L KCl}$  at the different scan rates of 10, 25, 50, 75 and  $100 \text{ mV/s}$ . The inset shows the linear relationship between the peak current ( $I_p$ ) and the square root of the scan rate ( $v^{1/2}$ ).
